# Supplementary material for: Quantification of azide groups on a material surface and a biomolecule using a clickable and cleavable fluorescent compound
Source: Royal Society of Chemistry journal article supplement (doi:10.1039/c8ra09421g), 2019-01-01
Supplement: c8ra09421g1.pdf [file c8ra09421g1.pdf]

## Electronic supplementary information

# Quantification of azide groups on a material surface and a biomolecule using a clickable and cleavable fluorescent compound

Rika Sakai,<sup>a</sup> Hiroki Iguchi,<sup>a</sup> and Tatsuo Maruyama<sup>\*,a</sup>

<sup>a</sup>Department of Chemical Science and Engineering, Graduate School of Engineering, Kobe University, 1-1 Rokkodai, Nada-ku, Kobe 657-8501, Japan.

## Experimental Procedures

### Results

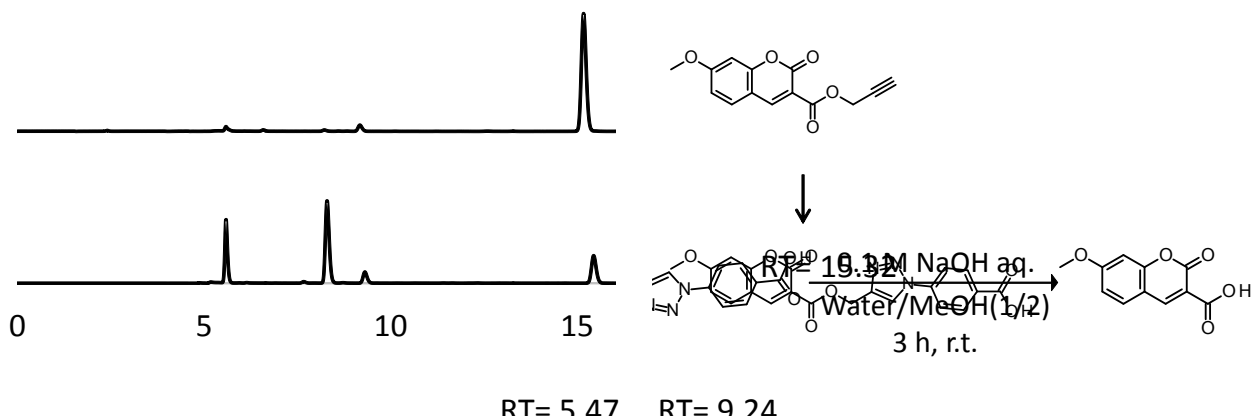

Fig. S1 HPLC profiles of C≡C-CMRN before and after the click reaction with azidobenzoic acid.

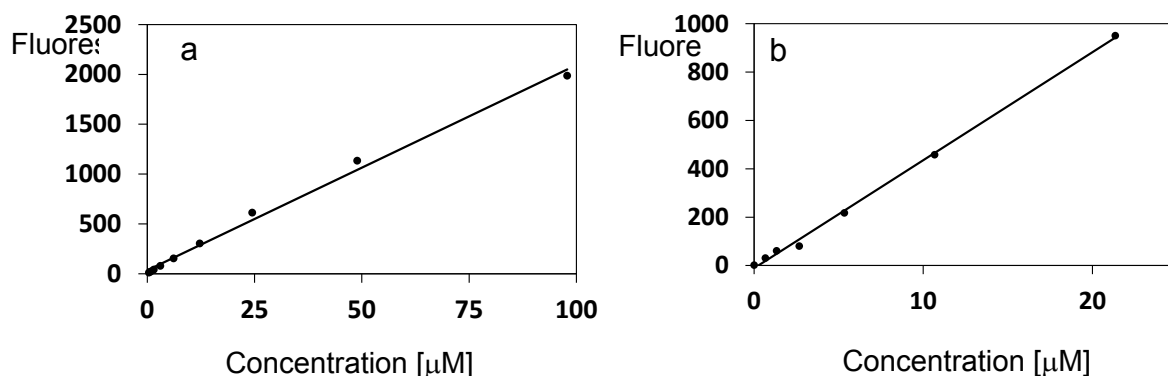

Fig. S2 Standard curves of CMRN fluorophore liberated from  $\text{C}\equiv\text{C}\text{-EG}_3\text{-CMRN}$ . (a) In phosphate buffer (0.1 M, pH 8). (b) In  $\text{NaHCO}_3$  buffer (0.1 M, pH 8) containing azidated  $\beta$ -casein. The sensitivity of a fluorometer was set at low.

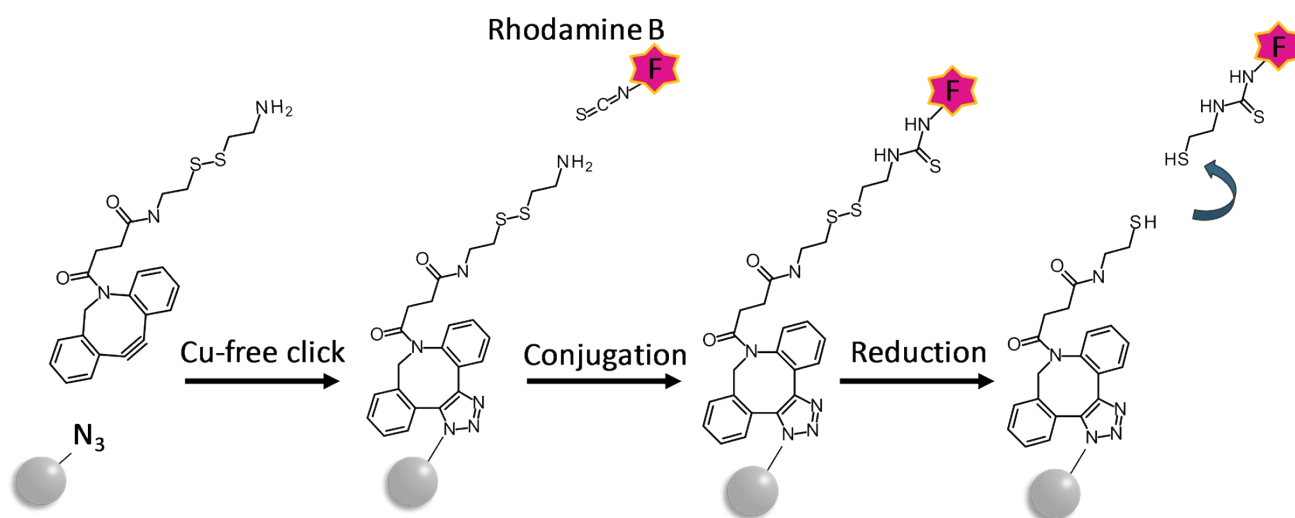

Fig. S3 Schematic illustration of the quantification of azide groups on resin surfaces using a Cu-free click reaction (strain-promoted azide–alkyne cycloaddition). Rhodamine B isothiocyanate (RITC) was used as an isothiocyanated fluorophore and tris(2-carboxyethyl)phosphine as used as a reducing agent.

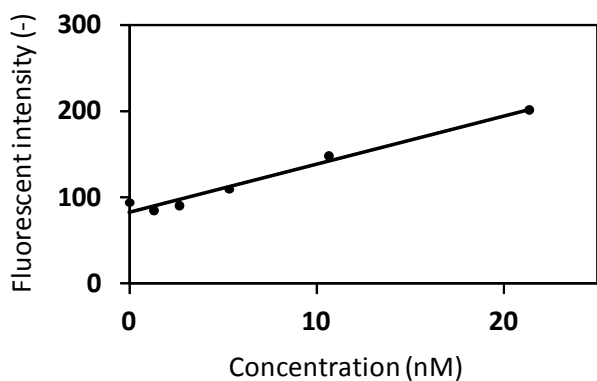

Fig. S4 Standard curve for the low concentrations of CMRN fluorophore liberated from  $C\equiv C-EG_3-$ CMRN in phosphate buffer (0.1 M, pH 8). The sensitivity of a fluorometer was set at high.

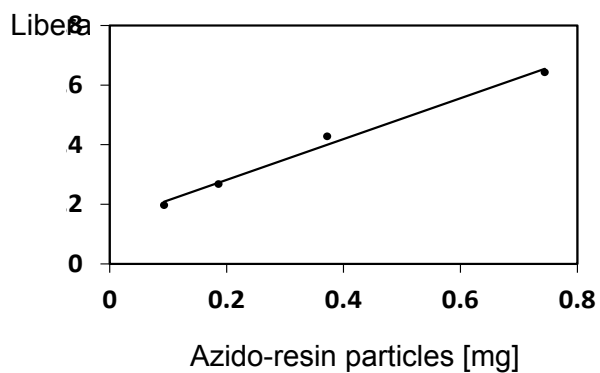

Fig. S5 Quantification of the azide groups on the resin particles using DBCO-S-S-amine and FITC. The sensitivity of a fluorometer was set at low.
